# Supplementary material
Source: HighWire-hosted journal article supplement (https://bjo.bmj.com/content/bjophthalmol-2021-319383)
Supplement: inline-supplementary-material-4 [file inline-supplementary-material-4.pdf]

| <b>a</b>     |             |             |                   |               |
|--------------|-------------|-------------|-------------------|---------------|
| <b>Week</b>  | <b>2018</b> | <b>2019</b> | <b>Forecasted</b> |               |
|              |             |             | <b>2020</b>       | <b>95% CI</b> |
| 12           | 24          | 20          | 18                | (9.3 - 35)    |
| 13           | 10          | 13          | 14                | (7 - 27)      |
| 14           | 21          | 12          | 12                | (6.1 - 23)    |
| 15           | 17          | 20          | 18                | (9.5 - 36)    |
| 16           | 16          | 15          | 14                | (7.2 - 27)    |
| 17           | 26          | 12          | 11                | (5.7 - 22)    |
| 18           | 25          | 31          | 29                | (15 - 56)     |
| 19           | 22          | 12          | 11                | (5.7 - 22)    |
| 20           | 24          | 18          | 16                | (8.4 - 32)    |
| 21           | 23          | 21          | 19                | (9.8 - 38)    |
| 22           | 18          | 6           | 5.4               | (2.8 - 11)    |
| 23           | 15          | 21          | 19                | (9.8 - 37)    |
| 24           | 19          | 14          | 13                | (6.6 - 25)    |
| 25           | 15          | 16          | 15                | (7.4 - 28)    |
| 26           | 12          | 24          | 23                | (12 - 44)     |
| 27           | 16          | 17          | 14                | (7 - 27)      |
| 28           | 19          | 15          | 16                | (8 - 31)      |
| 29           | 27          | 21          | 23                | (12 - 44)     |
| 30           | 25          | 17          | 20                | (10 - 40)     |
| 31           | 19          | 12          | 15                | (7.9 - 30)    |
| <b>Total</b> | <b>393</b>  | <b>337</b>  | <b>325.4</b>      |               |

| <b>b</b>     |             |             |                   |               |
|--------------|-------------|-------------|-------------------|---------------|
| <b>Week</b>  | <b>2018</b> | <b>2019</b> | <b>Forecasted</b> |               |
|              |             |             | <b>2020</b>       | <b>95% CI</b> |
| 12           | 3           | 8           | 8.0               | (-2.7 - 4.9)  |
| 13           | 2           | 1           | 1.1               | (-3.7 - 3.9)  |
| 14           | 0           | 3           | 3.1               | (-2.8 - 4.8)  |
| 15           | 6           | 1           | 1.1               | (0.2 - 7.8)   |
| 16           | 4           | 0           | 0.1               | (-2.8 - 4.8)  |
| 17           | 1           | 1           | 1.0               | (-3.8 - 3.8)  |
| 18           | 3           | 4           | 4.0               | (2.2 - 9.8)   |
| 19           | 1           | 1           | 1.0               | (-1.9 - 5.7)  |
| 20           | 5           | 0           | 0.0               | (-2.9 - 4.7)  |
| 21           | 3           | 6           | 6.0               | (-2.9 - 4.7)  |
| 22           | 1           | 2           | 1.9               | (2.1 - 9.7)   |
| 23           | 1           | 1           | 0.9               | (-2 - 5.6)    |
| 24           | 0           | 1           | 0.9               | (-0.15 - 7.4) |
| 25           | 1           | 6           | 5.9               | (-0.92 - 6.7) |
| 26           | 1           | 2           | 1.8               | (-1.7 - 5.9)  |
| 27           | 4           | 1           | 3.6               | (-0.83 - 6.8) |
| 28           | 3           | 2           | 2.9               | (-1.8 - 5.8)  |
| 29           | 2           | 3           | 2.1               | (-2.7 - 4.9)  |
| 30           | 3           | 3           | 3.0               | (-3.7 - 3.9)  |
| 31           | 2           | 2           | 2.0               | (-2.8 - 4.8)  |
| <b>Total</b> | <b>46</b>   | <b>48</b>   | <b>50.4</b>       |               |

**Supplementary Table 1. Number of nAMD patients initiating anti-VEGF therapy per week.**

(a) Moorfields Eye Hospital and (b) University Hospitals Birmingham. Displayed are data for the pre-COVID-19 era and predicted patients in corresponding weeks during the national lockdown period with 95% confidence level for prediction intervals.
