# Supplementary material
Source: HighWire-hosted journal article supplement (https://bjo.bmj.com/content/bjophthalmol-2021-319383)

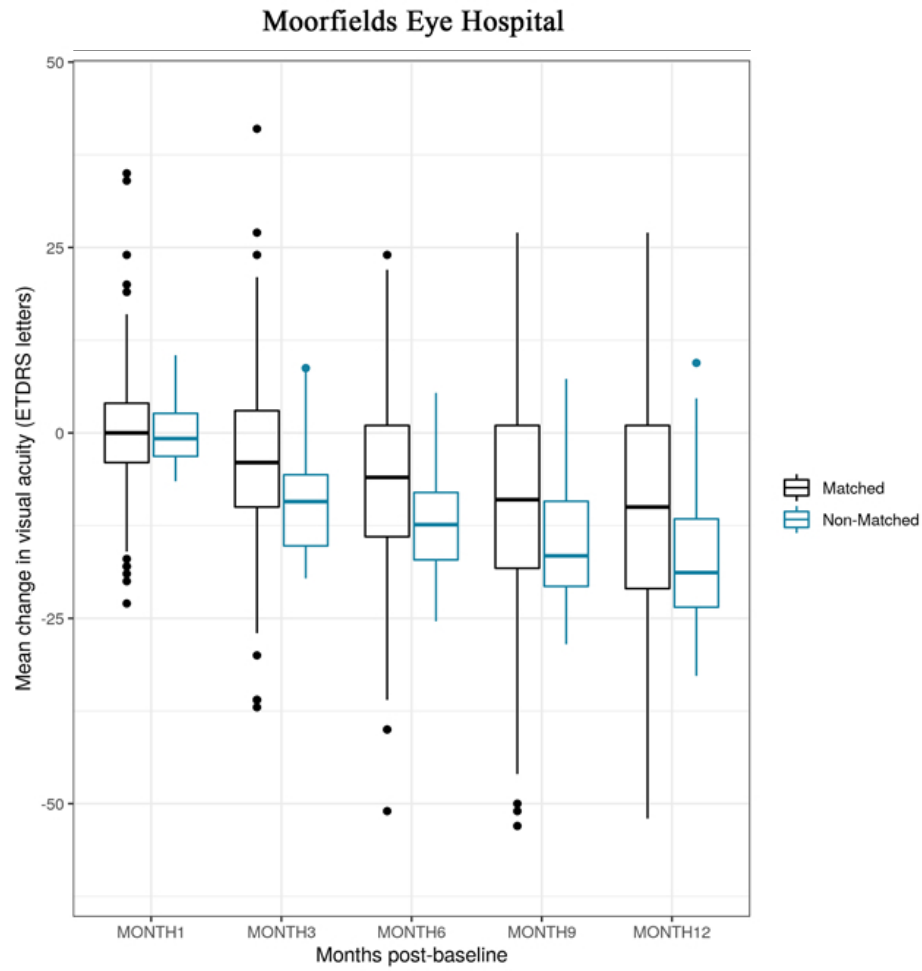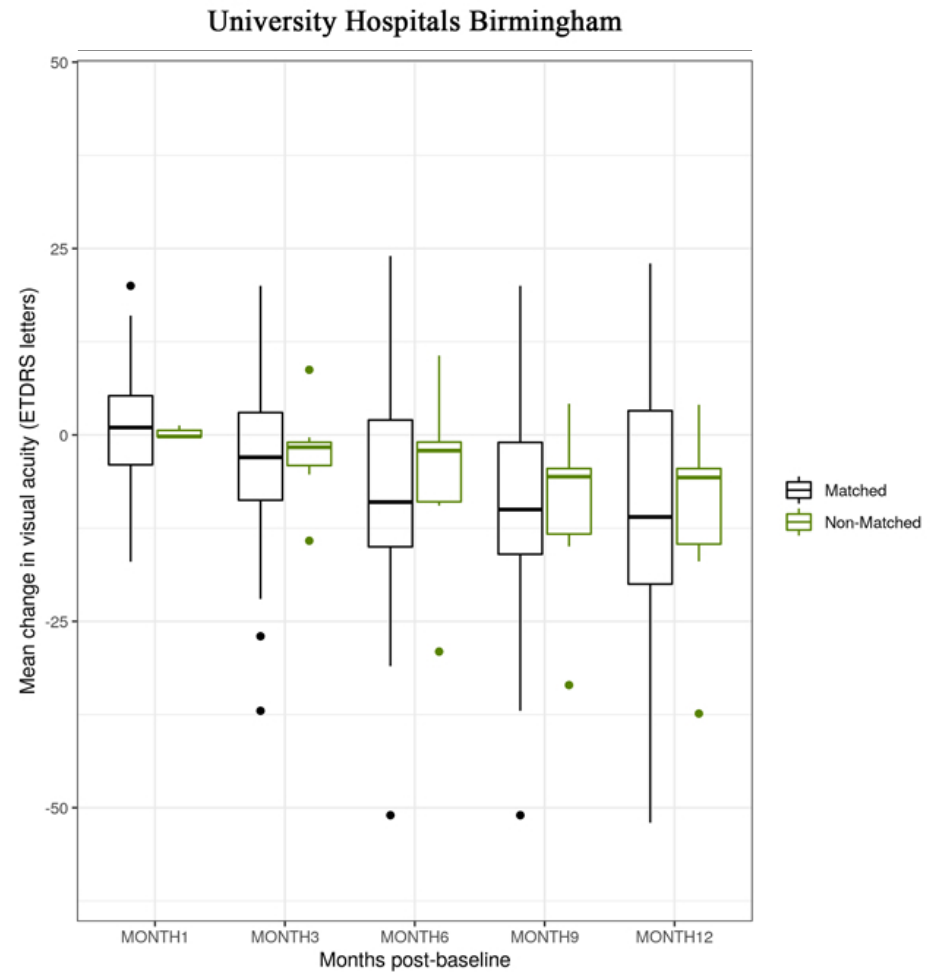

Supplement: inline-supplementary-material-3 [file inline-supplementary-material-3.pdf]

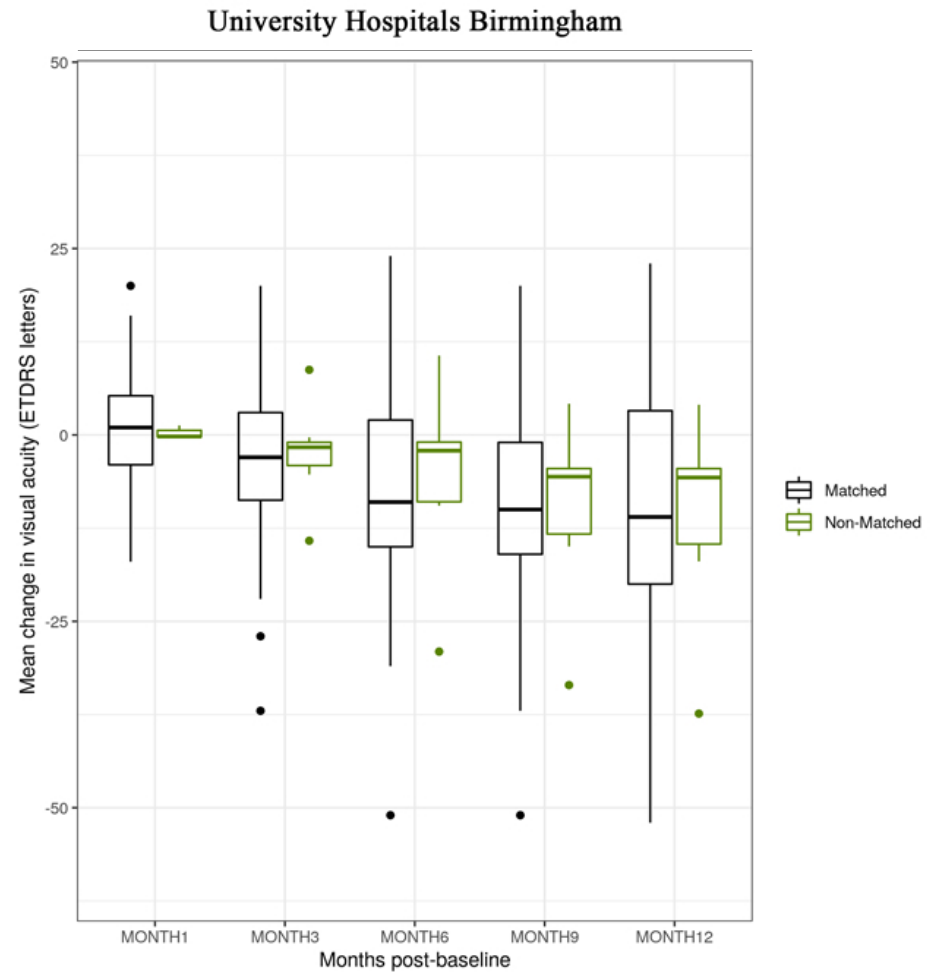

Supplement: inline-supplementary-material-3 [file inline-supplementary-material-3.pdf]
